# Supplementary material
Source: publisher figshare collection journal article supplement (https://acs.figshare.com/ndownloader/files/17385428)
Supplement: Supplementary file 2 [file 17385428]

Archive with 3 entries (3 files):
- info.xml
- cb9b00325_high_quality.mp4
- cb9b00325.pdf
