# Supplementary material
Source: publisher figshare collection journal article supplement (https://acs.figshare.com/ndownloader/files/17385428)
Supplement: Supplementary file 2 [file 17385428 › info.xml]

<presentation>
	<article>
		<title>Major Differences between the Self-Assembly and Seeding Behavior of Heparin-Induced and in Vitro Phosphorylated Tau and Their Modulation by Potential Inhibitors</title>
		<doi>10.1021/acschembio.9b00325</doi>
		<copyright>American Chemical Society</copyright>
		<narrator>Gal Bitan</narrator>
		<contact>Gal Bitan</contact>
		<contact-email>gbitan@mednet.ucla.edu</contact-email>
		<author-list>
			<author>Gal Bitan, Caroline Smet-Nocca</author>
		</author-list>
	</article>
	<slides height-width-ratio=".75">
		<slide audio-time="66">
			<subtitle/>
		</slide>
		<slide audio-time="120">
			<subtitle/>
		</slide>
		<slide audio-time="87">
			<subtitle/>
		</slide>
		<slide audio-time="165">
			<subtitle/>
		</slide>
		<slide audio-time="52">
			<subtitle/>
		</slide>
		<slide audio-time="76">
			<subtitle/>
		</slide>
		<slide audio-time="37">
			<subtitle/>
		</slide>
		<slide audio-time="70">
			<subtitle/>
		</slide>
	</slides>
	<audio duration="673"/>
</presentation>
